# Supplementary material for: Acceptance of Pharmaceutical Services by Home-Dwelling Older Patients: A Case Study in a Portuguese Community Pharmacy
Source: MDPI journal article supplement (doi:10.3390/ijerph18147401), 2021-07-11
Supplement: s1 [file s1]

**Aplicação de um questionário sobre os problemas relacionados com medicamentos em  
idosos polimedicados utentes de uma farmácia na região da beira interior**

Código do idoso: \_\_\_\_\_ N° do questionário: \_\_\_\_\_ Data da entrevista: \_\_\_\_\_

**I - Rotina Diária e Organização dos medicamentos pelo doente idoso**

(O idoso pode assinalar mais do que uma opção, se assim o desejar)

**1. Qual é a perceção que tem da sua saúde?**

Muito Boa \_\_ Boa \_\_ Média \_\_ Má \_\_ Muito má \_\_

**2. Quais os medicamentos que é mais frequente esquecer-se de tomar?**

- I.** Os que toma em jejum. \_\_
- II.** Os que toma ao pequeno-almoço. \_\_
- III.** Os que toma ao almoço. \_\_
- IV.** Os que toma ao lanche. \_\_
- V.** Os que toma ao jantar. \_\_
- VI.** Os que toma ao deitar. \_\_
- VII.** NS/NR. \_\_

**3. Como identifica os seus medicamentos?**

- I.** Pelo nome. \_\_
- II.** Pela cor dos comprimidos/cápsulas. \_\_
- III.** Pela caixa. \_\_
- IV.** Pela forma dos comprimidos/cápsulas. \_\_
- V.** Não os identifica, alguém os coloca numa caixa dispensadora de medicamentos. \_\_
- VI.** NS/NR. \_\_

**4. Na sua rotina diária por vezes sente dificuldades em:**

- I. Abrir os frascos dos medicamentos/blisters. \_\_\_\_
- II. Engolir alguns medicamentos. \_\_\_\_
- III. Recordar a forma correta de tomar alguns medicamentos. \_\_\_\_
- IV. Gerir os horários de tantos medicamentos. \_\_\_\_
- V. Utilizar alguns medicamentos (ex.inaladores). \_\_\_\_
- VI. Não tem qualquer dificuldade. \_\_\_\_
- VII. NS/NR. \_\_\_\_

**5. Que estratégias utiliza para não se esquecer de tomar os seus medicamentos?**

- I. Coloca um alarme. \_\_\_\_
- II. Utiliza uma caixa dispensadora onde coloca os do dia. \_\_\_\_
- III. Utiliza uma caixa dispensadora onde coloca os da semana. \_\_\_\_
- IV. Coloca as embalagens em sacos/locais separados, de acordo com o horário da toma (por exemplo os de almoço coloca todos juntos ). \_\_\_\_
- V. No início de cada refeição coloca na mesa os que tem de tomar. \_\_\_\_
- VI. Outra. \_\_\_\_ Qual? \_\_\_\_\_
- VII. Nenhuma. \_\_\_\_

**6. Quando o médico lhe prescreve um medicamento novo, costuma aconselhar-se com alguém antes de iniciar a toma?**

Sim \_\_\_\_ Não \_\_\_\_ Se sim, com quem? \_\_\_\_\_

**7. Com que frequência marca uma consulta de rotina no médico/a de família?**

Semanal \_\_\_\_ Mensal \_\_\_\_ Trimestral \_\_\_\_ Semestral \_\_\_\_ Anual \_\_\_\_ Outro

\_\_\_\_\_

**8. No último ano foi hospitalizado/a alguma vez?**

Sim \_\_\_\_ Não \_\_\_\_ NS/NR \_\_\_\_

8.1.Se sim, quantas vezes e porquê?\_\_\_\_\_

8.1.1.Após a alta, houve alteração da medicação crónica antes do internamento?\_\_\_\_\_

**9. No último ano foi às urgências alguma vez?**

Sim \_\_ Não \_\_ NS/NR \_\_ Se sim, quantas vezes e porquê?\_\_\_\_\_

**II-Avaliação de Adesão à terapêutica** (Medida de Adesão aos Tratamentos de *Delgado et al.*)

(Das seguintes opções de resposta o doente idoso deverá seleccionar uma)

|                                                                                                                                  | <b>Sempre</b> | <b>Quase sempre</b> | <b>Com frequência</b> | <b>Por vezes</b> | <b>Raramente</b> | <b>Nunca</b> |
|----------------------------------------------------------------------------------------------------------------------------------|---------------|---------------------|-----------------------|------------------|------------------|--------------|
| <b>1.Alguma vez se esqueceu de tomar os medicamentos para a sua doença?</b>                                                      |               |                     |                       |                  |                  |              |
| <b>2.Alguma vez foi descuidado com as horas da toma dos medicamentos para a sua doença?</b>                                      |               |                     |                       |                  |                  |              |
| <b>3.Alguma vez deixou de tomar os medicamentos para a sua doença por se ter sentido melhor?</b>                                 |               |                     |                       |                  |                  |              |
| <b>4.Alguma vez deixou de tomar os medicamentos para a sua doença por se ter sentido pior?</b>                                   |               |                     |                       |                  |                  |              |
| <b>5.Alguma vez tomou um ou vários comprimidos para a sua doença, por sua iniciativa, após se se ter sentido pior?</b>           |               |                     |                       |                  |                  |              |
| <b>6.Alguma vez interrompeu a terapêutica para a sua doença por ter deixado acabar os medicamentos?</b>                          |               |                     |                       |                  |                  |              |
| <b>7.Alguma vez deixou de tomar os medicamentos para a sua doença por alguma outra razão que não seja a indicação do medico?</b> |               |                     |                       |                  |                  |              |

**III- Conhecimentos dos idosos em relação aos seus medicamentos e identificação de algumas causas de problemas relacionados com os medicamentos**

Número total de medicamentos que o idoso toma : \_\_\_\_\_

|            |                                                                                                                |                                                                                                                                                                             |
|------------|----------------------------------------------------------------------------------------------------------------|-----------------------------------------------------------------------------------------------------------------------------------------------------------------------------|
| <b>Nº1</b> | <b>Nome comercial</b>                                                                                          |                                                                                                                                                                             |
|            | <b>Forma farmacêutica e dosagem</b>                                                                            |                                                                                                                                                                             |
|            | <b>Para que toma este medicamento?</b>                                                                         |                                                                                                                                                                             |
|            | <b>Quantas vezes toma por dia? (C 7.7)</b>                                                                     |                                                                                                                                                                             |
|            | <b>Quando toma ? (C 7.7)</b>                                                                                   | Jejum __ Pequeno almoço __ Almoço __ Lanche __<br>Jantar __ Ao deitar __ Não se lembra __                                                                                   |
|            | <b>Há quanto tempo toma?</b>                                                                                   | Menos de 1 mês __ Há mais de 1 mês e menos de 6 meses __<br>Mais de 6 meses__ Outro __ Não se lembra __                                                                     |
|            | <b>Tem que cortar o medicamento?</b>                                                                           | Sim __ Não __ Se sim , porquê?                                                                                                                                              |
|            | <b>Alguma vez reduziu a quantidade deste comparativamente ao prescrito ou não tomou o medicamento? (C 7.1)</b> | Sim __ Não __ Se sim , porquê?                                                                                                                                              |
|            | <b>Alguma vez aumentou a quantidade deste medicamento mais do que aquilo que foi prescrito? (C 7.2)</b>        | Sim __ Não __ Se sim , porquê?                                                                                                                                              |
|            | <b>Costuma tomar este medicamento com as refeições? (C 7.5)</b>                                                | Sim __ Não __                                                                                                                                                               |
|            | <b>Quando está fora de casa o dia todo, como faz para tomar este medicamento?</b>                              | Leva a medicação consigo __<br>Não toma nesse dia __<br>Toma quando chega a casa __<br>Leva consigo apenas os que acha mais importantes __<br>Toma antes de sair de casa __ |
|            | <b>Toma o medicamento com que bebida?</b>                                                                      |                                                                                                                                                                             |
|            | <b>Onde costuma guardar este medicamento? (C 7.6)</b>                                                          |                                                                                                                                                                             |
|            | <b>Tem alguma dificuldade em tomar o medicamento? (C 7.9)</b>                                                  | Sim __ Não __ Se sim , qual?                                                                                                                                                |
|            | <b>Percebe as instruções que lhe foram dadas para tomar esta medicação? (C 7.10)</b>                           | Sim __ Não __ Se não , qual?                                                                                                                                                |

**\* a tabela será repetida consoante o número de medicamentos que o idoso toma.**

1. De todos os medicamentos, existe algum que considera mais importante?  
Qual/ais e porquê?

\_\_\_\_\_

2. De todos os medicamentos existe algum que considera menos importante?  
Qual/ais e porquê?

\_\_\_\_\_

3. Gostaria de ter alguém que a ajudasse com a gestão diária dos seus medicamentos?

Sim \_\_\_ Não \_\_\_ Se sim, porquê?\_\_\_\_\_

**IV-Serviços na farmácia** (serviços esses que poderiam ser mais tarde aplicados caso os idosos adiram)

**1.Estaria disposto a pagar para na farmácia haver um serviço de revisão da terapêutica que pudesse resultar num serviço mais avançado de seguimento farmacoterapêutico?**

Sim \_\_\_ Não \_\_\_ Se não, porquê?\_\_\_\_\_

**2.Estaria disposto a pagar para na farmácia haver um serviço de preparação individualizada de medicação para que tivesse a sua medicação devidamente separada e adequada para cada altura do dia em que tem de tomar?**

Sim \_\_\_ Não \_\_\_ Se não, porquê?\_\_\_\_\_

#### **V-Characterização Sociodemográfica do idoso**

##### **1.Sexo:**

Feminino \_\_\_ Masculino \_\_\_ NS/NR \_\_\_

##### **2.Idade:**

\_\_\_\_\_

##### **3.Estado civil**

Solteiro(a) \_\_\_ União de facto \_\_\_ Casado(a) \_\_\_ Viúvo(a) \_\_\_ Divorciado(a) \_\_\_

**4. Com quem vive?**

Sozinho (a) \_\_ Cônjuge \_\_ Outros \_\_\_\_\_ NS/NR \_\_

**5. Que estudos completou?**

Não sabe ler nem escrever \_\_ Sabe ler e escrever sem concluir o grau de ensino \_\_ 1º ciclo \_\_  
2º Ciclo \_\_ 3º Ciclo \_\_ Ensino Secundário \_\_ Ensino médio \_\_ Ensino Superior \_\_ NS/NR  
\_\_

**6. Os rendimentos que auferem encontram-se entre que limites?**

<439€ \_\_ 440-580€ \_\_ 581-1160€ \_\_ >1161€ \_\_ NS/NR \_\_

Tempo dispendido: \_\_\_\_\_ A entrevistadora: \_\_\_\_\_

## Medicação crónica do utente

(listagem de medicação inserida no SIFARMA)

1. \_\_\_\_\_
2. \_\_\_\_\_
3. \_\_\_\_\_
4. \_\_\_\_\_
5. \_\_\_\_\_
6. \_\_\_\_\_
7. \_\_\_\_\_
8. \_\_\_\_\_
9. \_\_\_\_\_
10. \_\_\_\_\_
11. \_\_\_\_\_
12. \_\_\_\_\_
13. \_\_\_\_\_
14. \_\_\_\_\_
15. \_\_\_\_\_
