# Supplementary material for: Acceptance of Pharmaceutical Services by Home-Dwelling Older Patients: A Case Study in a Portuguese Community Pharmacy
Source: MDPI journal article supplement (doi:10.3390/ijerph18147401), 2021-07-11
Supplement: s1 [file s1]

Table S1- Prescribed medicines according to ATC classification system

| Prescribed medicine                                                                                 | Total number of consumed medicines | Number of patients (%) |
|-----------------------------------------------------------------------------------------------------|------------------------------------|------------------------|
| A- Alimentary tract and metabolism                                                                  | 154                                | 76 (86.4)              |
| A02- Drugs for acid related disorders                                                               | 58                                 | 57 (64.8)              |
| A02B- Drugs for peptic ulcer and gastro-oesophageal reflux disease (gord)                           | 58                                 | 57 (64.8)              |
| A02BC- Proton pump inhibitors                                                                       | 55                                 | 55 (62.5)              |
| A02BX- Other drugs for peptic ulcer and gastro-oesophageal reflux disease (gord)                    | 3                                  | 3 (3.4)                |
| A03- Drugs for functional gastrointestinal disorders                                                | 5                                  | 5 (5.7)                |
| A03A- Drugs for functional gastrointestinal disorders                                               | 4                                  | 4 (4.5)                |
| A03AB- Synthetic anticholinergics, quaternary ammonium compounds                                    | 1                                  | 1 (1.1)                |
| A03AX- Other drugs for functional gastrointestinal disorders                                        | 3                                  | 3 (3.4)                |
| A03F- Propulsives                                                                                   | 1                                  | 1 (1.1)                |
| A03FA- Propulsives                                                                                  | 1                                  | 1 (1.1)                |
| A05- Bile and liver therapy                                                                         | 3                                  | 3 (3.4)                |
| A05A Bile therapy                                                                                   | 3                                  | 3 (3.4)                |
| A05AA- Bile acids and derivatives                                                                   | 2                                  | 2 (2.3)                |
| A06- Drugs for constipation                                                                         | 4                                  | 4 (4.5)                |
| A06A- Drugs for constipation                                                                        | 2                                  | 2 (2.2)                |
| A06AC- Bulk-forming laxatives                                                                       | 1                                  | 1 (1.1)                |
| A06AD- Osmotically acting laxatives                                                                 | 1                                  | 1 (1.1)                |
| A09- Digestives, incl. Enzymes                                                                      | 2                                  | 2 (2.3)                |
| A09A- Digestives, incl. Enzymes                                                                     | 2                                  | 2 (2.3)                |
| A09AA- Enzyme preparations                                                                          | 2                                  | 2 (2.3)                |
| A10- Drugs used in diabetes                                                                         | 68                                 | 43 (48.9)              |
| A10A- Insulins and analogues                                                                        | 7                                  | 5 (5.7)                |
| A10AB- Insulins and analogues for injection, fast-acting                                            | 1                                  | 1 (1.1)                |
| A10AD- Insulins and analogues for injection, intermediate- or long-acting combined with fast-acting | 2                                  | 1 (1.1)                |
| A10AE- insulins and analogues for injection, long-acting                                            | 4                                  | 4 (4.5)                |

|                                                                |     |           |
|----------------------------------------------------------------|-----|-----------|
| A10B- Blood glucose lowering drugs, excl. Insulins             | 61  | 41 (46.6) |
| A10BA- Biguanides                                              | 24  | 24 (27.3) |
| A10BB- Sulfonylureas                                           | 9   | 9 (10.2)  |
| A10BD- Combinations of oral blood glucose lowering drugs       | 13  | 13 (14.8) |
| A10BG- Thiazolidinediones                                      | 1   | 1 (1.1)   |
| A10BH- Dipeptidyl peptidase 4 (dpp-4) inhibitors               | 8   | 7 (7.9)   |
| A10BK- Sodium-glucose co-transporter 2 (sglt2) inhibitors      | 6   | 6 (6.8)   |
| A11- Vitamins                                                  | 6   | 6 (6.8)   |
| A11C- Vitamin A and D, incl. Combinations of the two           | 6   | 6 (6.8)   |
| A11CC- Vitamin D and analogues                                 | 6   | 6 (6.8)   |
| A12- Mineral supplements                                       | 8   | 8 (9.1)   |
| A12A- Calcium                                                  | 8   | 8 (9.1)   |
| A12AX- Calcium, combinations with vitamin D and/or other drugs | 8   | 30 (34.1) |
| B- Blood and blood forming organs                              | 31  | 28 (31.8) |
| B01- Antithrombotic agents                                     | 29  | 28 (31.8) |
| B01A- Antithrombotic agents                                    | 29  | 2 (2.3)   |
| B01AA- Vitamin K antagonists                                   | 2   | 1 (1.1)   |
| B01AC- Platelet aggregation inhibitors excl. Heparin           | 18  | 17 (19.2) |
| B01AE- Direct thrombin inhibitors                              | 1   | 1 (1.1)   |
| B01AF- Direct factor xa inhibitors                             | 8   | 8 (9.1)   |
| B03- Antianemic preparations                                   | 2   | 2 (2.3)   |
| B03A- Iron preparations                                        | 1   | 1 (1.1)   |
| B03AA- Iron bivalent, oral preparations                        | 1   | 1 (1.1)   |
| B03B- Vitamin B12 and folic acid                               | 1   | 1 (1.1)   |
| B03BB- Folic acid and derivatives                              | 1   | 1 (1.1)   |
| C- cardiovascular system                                       | 223 | 86 (96.6) |
| C01- Cardiac therapy                                           | 18  | 17 (19.3) |
| C01A- Cardiac glycosides                                       | 8   | 8 (9.1)   |
| C01AA- Digitalis glycosides                                    | 8   | 8 (9.1)   |
| C01B- Antiarrhythmics, class I and III                         | 1   | 1 (1.1)   |
| C01BD- Antiarrhythmics, class III                              | 1   | 1 (1.1)   |
| C01D- Vasodilators used in cardiac diseases                    | 5   | 5 (5.7)   |
| C01DA- Organic nitrates                                        | 5   | 5 (5.7)   |

|                                                                       |    |           |
|-----------------------------------------------------------------------|----|-----------|
| C01E- Other cardiac preparations                                      | 4  | 3 (3.4)   |
| C01EB- Other cardiac preparations                                     | 4  | 3 (3.4)   |
| C03- Diuretics                                                        | 35 | 28 (31.9) |
| C03B- Low-ceiling diuretics, excl. Thiazides                          | 12 | 12 (13.6) |
| C03BA- Sulfonamides, plain                                            | 12 | 12 (13.6) |
| C03C- High-ceiling diuretics                                          | 16 | 16 (18.2) |
| C03CA- Sulfonamides, plain                                            | 16 | 16 (18.2) |
| C03D- Potassium-sparing agents 7                                      | 7  | 7 (8.0)   |
| C03DA- Aldosterone antagonists                                        | 7  | 7 (8.0)   |
| C04- Peripheral vasodilators                                          | 4  | 4 (4.5)   |
| C04A- Peripheral vasodilators                                         | 4  | 4 (4.5)   |
| C04AD- Purine derivatives                                             | 4  | 4 (4.5)   |
| C05- Vasoprotectives                                                  | 7  | 7 (8.0)   |
| C05C- Capillary stabilizing agents                                    | 7  | 7 (8.0)   |
| C05CA- Bioflavonoids                                                  | 6  | 6 (6.8)   |
| C05CX- Other capillary stabilizing agents                             | 1  | 1 (1.1)   |
| C07- Beta blocking agents                                             | 19 | 19 (21.6) |
| C07A- Beta blocking agents                                            | 18 | 18 (20.5) |
| C07AA- Beta blocking agents, non-selective                            | 1  | 1 (1.1)   |
| C07AB- Beta blocking agents, selective                                | 13 | 13 (14.8) |
| C07AG- Alpha and beta blocking agents                                 | 4  | 4 (4.5)   |
| C07B- Beta blocking agents and thiazides                              | 1  | 1 (1.1)   |
| C07BB- Beta blocking agents, selective, and thiazides                 | 1  | 1 (1.1)   |
| C08- Calcium channel blockers                                         | 18 | 17 (19.2) |
| C08C- Selective calcium channel blockers with mainly vascular effects | 15 | 14 (15.9) |
| C08CA- Dihydropyridine derivatives                                    | 15 | 14 (15.9) |
| C08D- Selective calcium channel blockers with direct cardiac effects  | 2  | 2 (2.3)   |
| C08DB- Benzothiazepine derivatives                                    | 2  | 2 (2.3)   |
| C09- Agents acting on the renin-angiotensin system                    | 62 | 62 (70.5) |
| C09A- ACE inhibitors, plain                                           | 12 | 12 (13.6) |
| C09AA- ACE inhibitors, plain                                          | 12 | 12 (13.6) |
| C09B- ACE inhibitors, combinations                                    | 7  | 7 8       |
| C09BA- ACE inhibitors and diuretics                                   | 3  | 3 (3.4)   |

|                                                                                      |    |           |
|--------------------------------------------------------------------------------------|----|-----------|
| C09BB- ACE inhibitors and calcium channel blockers                                   | 3  | 3 (3.4)   |
| C09C- Angiotensin II receptor blockers (ARBS), plain                                 | 17 | 17 (19.3) |
| C09CA- Angiotensin II receptor blockers (ARBs), plain                                | 17 | 17 (19.3) |
| C09D- Angiotensin ii receptor blockers (arbs), combinations                          | 26 | 26 (29.5) |
| C09DA- Angiotensin II receptor blockers (ARBs) and diuretics                         | 11 | 11 (12.5) |
| C09DB- Angiotensin II receptor blockers (ARBs) and calcium channel blockers          | 13 | 13 (14.8) |
| C09DX- Angiotensin II receptor blockers (ARBs), other combinations                   | 1  | 1 (1.1)   |
| C10- Lipid modifying agents                                                          | 59 | 54 (61.1) |
| C10A- Lipid modifying agents, plain                                                  | 56 | 51 (68.0) |
| C10AA- HMG CoA reductase inhibitors                                                  | 43 | 43 (48.9) |
| C10AB- Fibrates                                                                      | 12 | 12 (13.6) |
| C10AX- Other lipid modifying agents                                                  | 1  | 1 (1.1)   |
| C10B- Lipid modifying agents, combinations                                           | 3  | 3 (3.4)   |
| C10BA- HMG CoA reductase inhibitors in combination with other lipid modifying agents | 3  | 3 (3.4)   |
| D- Dermatologicals                                                                   | 1  | 1 (1.1)   |
| D02-Emollients and protectives                                                       | 1  | 1 (1.1)   |
| D02A-Emollients and protectives                                                      | 1  | 1 (1.1)   |
| D02AX- Other Emollients and protectives                                              | 1  | 1 (1.1)   |
| G- Genito urinary system and sex hormones                                            | 20 | 17 (19.3) |
| G03- Sex hormones and modulators of the genital system                               | 5  | 5 (5.7)   |
| G03C- Estrogens                                                                      | 4  | 4 (4.5)   |
| G03CA- Natural and semisynthetic estrogens, plain                                    | 4  | 4 (4.5)   |
| G03H- Antiandrogens                                                                  | 1  | 1 (1.1)   |
| G03HA- Antiandrogens, plain                                                          | 1  | 1 (1.1)   |
| G04- Urologicals                                                                     | 15 | 13 (14.8) |
| G04B Urologicals                                                                     | 3  | 3 (3.4)   |
| G04BD Drugs for urinary frequency and incontinence                                   | 2  | 2 (2.3)   |
| G04C Drugs used in benign prostatic hypertrophy                                      | 12 | 10 (11.4) |
| G04CA Alpha-adrenoreceptor antagonists                                               | 9  | 9 (10,2)  |
| G04CB Testosterone-5-alpha reductase inhibitors                                      | 2  | 2 (2.3)   |

|                                                                      |      |           |
|----------------------------------------------------------------------|------|-----------|
| G04CX Other drugs used in benign prostatic hypertrophy               | 1    | 1 (1.1)   |
| H- Systemic hormonal preparations, excl. Sex hormones and insulins   | (22) | 22 (25.0) |
| H03- Thyroid therapy                                                 | (16) | 16 (18.2) |
| H03A- Thyroid preparations                                           | (14) | 14 (15.9) |
| H03AA- Thyroid hormones                                              | (14) | 14 (15.9) |
| H03B- Antithyroid preparations                                       | 2    | 2 (2.3)   |
| H03BA- Thiouracils                                                   | 1    | 1 (1.1)   |
| H03BB- Sulfur-containing imidazole derivatives                       | ()   | 1 (1.1)   |
| J- Antiinfectives for systemic use                                   | 2    | 2 (2.3)   |
| J07- Vaccines                                                        | 1    | 1 (1.1)   |
| J07A Bacterial vaccines                                              | 1    | 1 (1.1)   |
| J07AX- Other bacterial vaccines                                      | 1    | 1 (1.1)   |
| L- Antineoplastic and immunomodulating agents                        | 3    | 3 (3.4)   |
| L01- Antineoplastic agents                                           | 1    | 1 (1.1)   |
| L01B- Antimetabolites                                                | 1    | 1 (1.1)   |
| L01BA- Folic acid analogues                                          | 1    | 1 (1.1)   |
| L02- Endocrine therapy                                               | 2    | 2 (2.3)   |
| L02B- Hormone antagonists and related agents                         | 2    | 2 (2.3)   |
| L02BG- Aromatase inhibitors                                          | 2    | 2 (2.3)   |
| M- Musculo-skeletal system                                           | (37) | 29 (32.9) |
| M01- Antiinflammatory and antirheumatic products                     | 20   | 17 (19.3) |
| M01A- Antiinflammatory and antirheumatic products, non-steroids      | 20   | 17 (19.3) |
| M01AB- Acetic acid derivatives and related substances                | 8    | 8 (9.1)   |
| M01AE- Propionic acid derivatives                                    | 4    | 4 (4.5)   |
| M01AH- Coxibs                                                        | 3    | 3 (3.4)   |
| M01AX- Other antiinflammatory and antirheumatic agents, non-steroids | 4    | 4 (4.5)   |
| M03- Muscle relaxants                                                | 4    | 4 (4.5)   |
| M03B- Muscle relaxants, centrally acting agents                      | 4    | 4 (4.5)   |
| M03BX- Other centrally acting agents                                 | 4    | 4 (4.5)   |
| M04- Antigout preparations                                           | 7    | 7 (8.0)   |
| M04A- Antigout preparations                                          | 7    | 7 (8.0)   |

|                                                            |       |           |
|------------------------------------------------------------|-------|-----------|
| M04AA- Preparations inhibiting uric acid production        | 5     | 5 (5.7)   |
| M04AC- Preparations with no effect on uric acid metabolism | 2     | 2 (2.3)   |
| N- Nervous system                                          | (107) | 58 (55.9) |
| N02- Analgesics                                            | (14)  | 14 (15.9) |
| N02A- Opioids                                              | 7     | 7 (8.0)   |
| N02AJ- Opioids in combination with non-opioid analgesics   | 6     | 6 (6.8)   |
| N02AX- Other opioids                                       | 1     | 1 (1.1)   |
| N02B- Other analgesics and antipyretics                    | 7     | 7 (8.0)   |
| N02BB- Pyrazolones                                         | 1     | 1 (1.1)   |
| N02BE- Anilides                                            | 6     | 6 (6.8)   |
| N03- Antiepileptics                                        | 12    | 12 (13.6) |
| N03A- Antiepileptics                                       | 12    | 12 (13.6) |
| N03AA- Barbiturates and derivatives                        | 2     | 2 (2.3)   |
| N03AE- Benzodiazepine derivatives                          | 1     | 1 (1.1)   |
| N03AG- Fatty acid derivatives                              | 1     | 1 (1.1)   |
| N03AX- Other antiepileptics                                | 8     | 8 (9.1)   |
| N04- Anti-Parkinson drugs                                  | 7     | 5 (5.6)   |
| N04B- Dopaminergic agents                                  | 7     | 5 (5.6)   |
| N04BA- Dopa and dopa derivatives                           | 4     | 3 (3.4)   |
| N04BC- Dopamine agonists                                   | 3     | 3 (3.4)   |
| N05- Psycholeptics                                         | (42)  | 32 (36.4) |
| N05A- Antipsychotics                                       | 7     | 5 (5.7)   |
| N05AD- Butyrophenone derivatives                           | 3     | 3 (3.4)   |
| N05AH- Diazepines, oxazepines, thiazepines and oxepines    | 2     | 2 (2.3)   |
| N05AX- Other antipsychotics                                | 2     | 2 (2.3)   |
| N05B- Anxiolytics                                          | (34)  | 31 (35.2) |
| N05BA- Benzodiazepine derivatives                          | (33)  | 31 (35.2) |
| N05BB- Diphenylmethane derivatives                         | 1     | 1 (1.1)   |
| N05C- Hypnotics and sedatives                              | 1     | 1 (1.1)   |
| N05CF Benzodiazepine related drugs                         | 1     | 1 (1.1)   |

|                                                                                               |      |           |
|-----------------------------------------------------------------------------------------------|------|-----------|
| N06- Psychoanaleptics                                                                         | (28) | 24 (27.2) |
| N06A- Antidepressants                                                                         | (25) | 23 (26.2) |
| N06AA- Non-selective monoamine reuptake inhibitors                                            | 1    | 1 (1.1)   |
| N06AB- Selective serotonin reuptake inhibitors                                                | 13   | 13 (14.8) |
| N06AG -Monoamine oxidase A inhibitors                                                         | 1    | 1 (1.1)   |
| N06AX- Other antidepressants                                                                  | 11   | 11 (12.5) |
| N06B- Psychostimulants, agents used for ADHD and nootropics                                   | 1    | 1 (1.1)   |
| N06BX- Other psychostimulants and nootropics                                                  | 1    | 1 (1.1)   |
| N06D- Anti-dementia drugs                                                                     | 2    | 2 (2.3)   |
| N06DX- Other anti-dementia drugs                                                              | 2    | 2 (2.3)   |
| N07- Other nervous system drugs                                                               | 4    | 4 (4.5)   |
| N07C- Antivertigo preparations                                                                | 4    | 4 (4.5)   |
| N07CA- Antivertigo preparations                                                               | 4    | 4 (4.5)   |
| R- Respiratory system                                                                         | (32) | 14 (15.9) |
| R03- Drugs for obstructive airway diseases                                                    | (21) | 14 (15.9) |
| R03A- Adrenergics, inhalants                                                                  | 15   | 13 (14.8) |
| R03AC- Selective beta-2-adrenoreceptor agonists                                               | 3    | 3 (3.4)   |
| R03AK- Adrenergics in combination with corticosteroids or other drugs, excl. anticholinergics | 11   | 11 (12.5) |
| R03B- Other drugs for obstructive airway diseases, inhalants                                  | 3    | 3 (3.3)   |
| R03BA- Glucocorticoids                                                                        | 1    | 1 (1.1)   |
| R03BB- Anticholinergics                                                                       | 2    | 2 (2.2)   |
| R03D- Other systemic drugs for obstructive airway diseases                                    | 3    | 3 (3.3)   |
| R03DA- Xanthines                                                                              | 1    | 1 (1.1)   |
| R03DC- Leukotriene receptor antagonists                                                       | 2    | 2 (2.2)   |
| R05- Cough and cold preparations                                                              | 1    | 1 (1.1)   |
| R05C- Expectorants, excl. combinations with cough suppressants                                | 1    | 1 (1.1)   |
| R05CB- Mucolytics                                                                             | 1    | 1 (1.1)   |
| R06- Antihistamines for systemic use                                                          | 1    | 1 (1.1)   |
| R06A- Antihistamines for systemic use                                                         | 5    | 5 (5.7)   |
| R06AX- Antihistamines for systemic use                                                        | 5    | 5 (5.7)   |
| S- Sensory organs                                                                             | 8    | 4 (4.6)   |

|                                             |   |         |
|---------------------------------------------|---|---------|
| S01- Ophthalmologicals                      | 7 | 3 (3.4) |
| S01E- Antiglaucoma preparations and miotics | 7 | 3 (3.4) |
| S01EA- Sympathomimetics in glaucoma therapy | 2 | 2 (2.3) |
| S01EC- Carbonic anhydrase inhibitors        | 2 | 2 (2.3) |
| S01ED- Beta blocking agents                 | 2 | 2 (2.3) |
| S01EE- Prostaglandin analogues              | 1 | 1 (1.1) |
| S02- Otologicals                            | 1 | 1 (1.1) |
| S02D- Other otologicals                     | 1 | 1 (1.1) |
| S02DC- Indifferent preparations             | 1 | 1 (1.1) |
